# Supplementary material for: Towards routine long-read sequencing for rare disease: a national pilot study on chromosomal rearrangements
Source: bioRxiv or medRxiv preprint supplement (doi:10.1101/2023.12.15.23299892), 2024-04-15
Supplement: Supplementary file [file media-1.pdf]

## Supplementary Tables

**Table S1:** Basic quality metrics of the samples included in this study

| Sample ID | Mean coverage | Mean read length (bp) | Sequencing Yield (Gb) |
|-----------|---------------|-----------------------|-----------------------|
| P1        | 26.5          | 12,307                | 82                    |
| P2        | 31.7          | 14,896                | 98                    |
| P3        | 27.5          | 12,563                | 85                    |
| P4        | 21.2          | 11,233                | 66                    |
| P5        | 22.7          | 9,567                 | 70                    |
| P6        | 19.9          | 8,343                 | 62                    |
| P7.1      | 31.7          | 14,265                | 98                    |
| P7.2      | 25.2          | 12,277                | 78                    |
| P7.3      | 25.2          | 12,284                | 78                    |
| P8.1      | 32.1          | 15,104                | 99                    |
| P8.2      | 31.0          | 17,612                | 96                    |
| P9        | 27.5          | 13,285                | 86                    |
| P10       | 20.1          | 9,849                 | 63                    |
| P11       | 27.4          | 15,716                | 90                    |
| P12       | 24.9          | 18,810                | 84                    |
| P13       | 35.5          | 17,940                | 119                   |

Bp, base pairs; Gb, giga bases

**Table S2:** De novo assembly quality metrics

| <b>Assembly</b> | <b>Contigs (n)</b> | <b>Total length (bp)</b> | <b>N50 (bp)</b> | <b>Genome Fraction (%)</b> | <b>Small variants(n)</b> | <b>SVs (n)</b> | <b>Indels</b> |
|-----------------|--------------------|--------------------------|-----------------|----------------------------|--------------------------|----------------|---------------|
| P1 hap1         | 952                | 3011730018               | 27656118        | 97.294                     | 3573451                  | 34337          | 706786        |
| P1 hap2         | 809                | 3020289601               | 27627387        | 97.003                     | 3579905                  |                | 703549        |
| P1 no hap       | 497                | 3055351291               | 39172056        | 97.545                     | 3602598                  | 33737          | 707649        |
| P2 hap1         | 528                | 3049271102               | 53162323        | 97.431                     | 3625230                  | 35135          | 713293        |
| P2 hap2         | 607                | 3022576100               | 30089741        | 97.345                     | 3639562                  |                | 716270        |
| P2 no hap       | 373                | 3077093992               | 55656714        | 97.596                     | 3665279                  | 34006          | 718203        |
| P3 hap1         | 805                | 2968923625               | 38003410        | 95.147                     | 3629122                  | 35288          | 714993        |
| P3 hap2         | 683                | 2955832984               | 26901484        | 94.768                     | 3608950                  |                | 709099        |
| P3 no hap       | 470                | 3070113002               | 57555714        | 97.867                     | 3727047                  | 32916          | 732983        |
| P4 hap1         | 2167               | 3009507143               | 10032076        | 96.786                     | 3543724                  | 33,371         | 723511        |
| P4 hap2         | 1870               | 2994360817               | 10443380        | 96.707                     | 3600158                  |                | 729278        |
| P4 no hap       | 990                | 3061337924               | 31471136        | 97.581                     | 3649743                  | 33158          | 734887        |
| P5 hap1         | 1410               | 3021926484               | 16791079        | 97.001                     | 3564965                  | 33505          | 710273        |
| P5 hap2         | 1442               | 3002452954               | 10513426        | 96.988                     | 3559703                  |                | 710897        |
| P5 no hap       | 780                | 3050115512               | 32705197        | 97.460                     | 3621814                  | 33780          | 717110        |
| P6 hap1         | 2891               | 2990264780               | 5665656         | 96.073                     | 3589314                  | 33140          | 734226        |
| P6 hap2         | 2786               | 2894053352               | 5660041         | 93.124                     | 3516636                  |                | 718105        |
| P6 no hap       | 1092               | 3059225159               | 20150227        | 97.822                     | 3667936                  | 32845          | 746927        |
| P7.1 hap1       | 543                | 3038562420               | 44240849        | 97.376                     | 3620569                  | 35664          | 708884        |
| P7.1 hap2       | 516                | 3037726858               | 49152777        | 97.415                     | 3627346                  |                | 709222        |
| P7.1 no hap     | 387                | 3070887463               | 70906275        | 97.538                     | 3650945                  | 34901          | 710859        |
| P7.2 hap1       | 1098               | 3004917728               | 26806592        | 96.139                     | 3581699                  | 34708          | 714973        |
| P7.2 hap2       | 909                | 2994455258               | 23607483        | 95.712                     | 3581148                  |                | 715250        |
| P7.2 no hap     | 579                | 3083744197               | 43485889        | 98.143                     | 3649458                  | 34144          | 727696        |

|             |      |            |          |        |         |       |         |
|-------------|------|------------|----------|--------|---------|-------|---------|
| P7.3 hap1   | 919  | 3007113736 | 29658224 | 97.315 | 3602776 | 35187 | 716780  |
| P7.3 hap2   | 785  | 3029744114 | 24927346 | 97.265 | 3628930 |       | 716232  |
| P7.3 no hap | 514  | 3055007195 | 53717007 | 97.582 | 3660593 | 34144 | 720613  |
| P8.1 hap1   | 541  | 3024919811 | 56515313 | 97.460 | 3627237 | 35517 | 708068  |
| P8.1 hap2   | 571  | 3025639302 | 38174944 | 97.279 | 3594413 |       | 706405  |
| P8.1 no hap | 367  | 3065271514 | 69545151 | 97.632 | 3643325 | 36161 | 709464  |
| P8.2 hap1   | 628  | 3027302868 | 62105149 | 97.384 | 3621918 |       | 706580  |
| P8.2 hap2   | 526  | 3015816193 | 49998385 | 97.365 | 2469965 |       | 491224  |
| P8.2 no hap | 415  | 3058931416 | 73038069 | 97.708 | 3667377 | 33791 | 711103  |
| P9 hap1     | 655  | 3034915555 | 54793259 | 97.408 | 3600299 | 33117 | 711583  |
| P9 hap2     | 706  | 3025770706 | 28512459 | 97.274 | 3570230 |       | 2861175 |
| P9 no hap   | 554  | 3066133149 | 53797994 | 97.617 | 3604444 | 33028 | 712078  |
| P10 hap1    | 2742 | 3014608061 | 8875707  | 96.653 | 3548895 | 35094 | 722959  |
| P10 hap2    | 2623 | 2886636947 | 7067025  | 92.984 | 3473909 |       | 704156  |
| P10 no hap  | 1301 | 3062985831 | 27709462 | 97.976 | 3617165 | 29860 | 732080  |
| P11 hap1    | 940  | 3033114741 | 40056718 | 96.571 | 3621609 | 34036 | 711084  |
| P11 hap2    | 884  | 2978655919 | 31312892 | 95.787 | 3525896 |       | 699382  |
| P11 no hap  | 597  | 3051400356 | 62335257 | 97.275 | 3647060 | 33749 | 714031  |
| P12 hap1    | 1300 | 3036918378 | 23705991 | 96.653 | 3610216 | 34670 | 750021  |
| P12 hap2    | 1047 | 2916967371 | 21936164 | 93.432 | 3550325 |       | 730708  |
| P12 no hap  | 746  | 3088070636 | 40766497 | 97.750 | 3699510 | 32626 | 759519  |
| P13 hap1    | 305  | 3021367031 | 58169784 | 96.398 | 3602439 | 34989 | 707153  |
| P13 hap2    | 278  | 2936874730 | 60498075 | 93.783 | 3563910 |       | 694026  |
| P13 no hap  | 276  | 3101975158 | 85852130 | 97.896 | 3677600 | 36840 | 716890  |

**Table S3:** De novo assembly variant calling

| Sample ID | ChrA | posA      | chrB | posB       | Found? |
|-----------|------|-----------|------|------------|--------|
| P1        | 4    | 181414917 | 9    | 13043905   | Yes    |
|           | 16   | 28454138  | 16   | 29 482 543 | Yes    |
| P2        | -    | -         | -    | -          | -      |
| P3        | 22   | 50618055  | 22   | 50624868   | Yes    |
|           | 22   | 50624361  | 22   | 50626277   | Yes    |
| P4        | 2    | 5549092   | 2    | 5858296    | Yes    |
|           | 2    | 5620671   | 2    | 7241289    | No     |
|           | 2    | 6246303   | 2    | 7734100    | Yes    |
|           | 2    | 6248808   | 2    | 7246507    | Yes    |
|           | 2    | 132954122 | 2    | 137703180  | Yes    |
|           | 2    | 133434126 | 2    | 141163928  | Yes    |
| P5        | 3    | 54518907  | 3    | 63614153   | Yes    |
|           | 3    | 59407900  | 3    | 135767535  | Yes    |
|           | 3    | 63614153  | 3    | 145600155  | Yes    |
|           | 3    | 80981660  | 3    | 135891958  | Yes    |
|           | 3    | 80981660  | 3    | 148110490  | Yes    |
| P6        | 9    | 97596764  | X    | 153779639  | Yes    |
|           | 9    | 97598236  | X    | 153724706  |        |

|      |   |           |    |           |                 |
|------|---|-----------|----|-----------|-----------------|
| P7.1 | 1 | 19783172  | 10 | 95395335  | Yes             |
|      | 1 | 19783105  | 10 | 95395328  | Yes             |
|      | 2 | 189694535 | 2  | 202576085 | Yes             |
|      | 2 | 189694533 | 2  | 202576083 | Yes             |
| P7.2 | - | -         | -  | -         | -               |
| P7.3 | 1 | 19783172  | 10 | 95395335  | Yes             |
|      | 1 | 19783105  | 10 | 95395328  | Yes             |
|      | 2 | 189694535 | 2  | 202576085 | Yes             |
|      | 2 | 189694533 | 2  | 202576083 | Yes             |
| P8.1 | X | 9420014   | X  | 154113037 | Yes             |
|      | X | 9768909   | X  | 154208530 | No              |
| P8.2 | X | 9420014   | X  | 154113037 | Yes, non-phased |
|      | X | 9768909   | X  | 154208530 | Yes, non-phased |
| P9   | 9 | 75862011* | X  | 3044233   | Yes             |
|      | 9 | 75862011* | X  | 3044228   | Yes             |
| P10  | - | -         | -  | -         | -               |
| P11  | X | 101431832 | X  | 55349282  | Yes             |
| P12  | 4 | 80390384  | 6  | 20052376  | Yes             |
|      | 1 | 58205788  | 4  | 106505089 | Yes             |

|     |   |           |   |          |     |
|-----|---|-----------|---|----------|-----|
|     | 6 | 20052374  | 4 | 94218568 | Yes |
|     | 4 | 106505092 | 1 | 58205785 | Yes |
|     | 6 | 48002694  | 6 | 49160076 | Yes |
| P13 | - | -         | - | -        | -   |

## Supplementary Figures

**Figure S1: Read coverage variation across chromosome 15.** Average read coverage per 1 MB segments of chromosome 15 for sample P2.

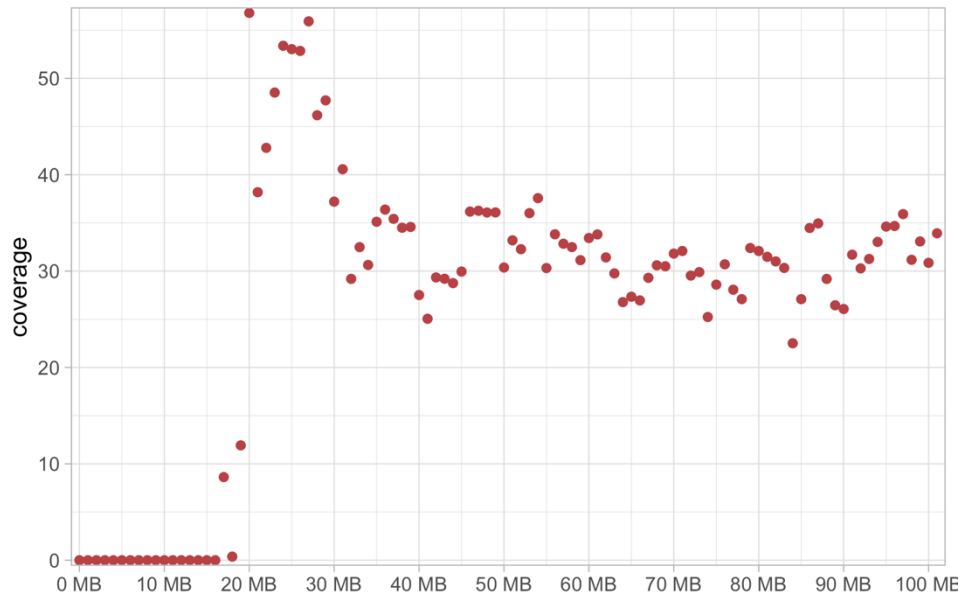

## Figure S2: Subway plots of characterized rearrangements. Schematic

illustrations of the resolved rearrangements in P3, P6, P4, P11 and P8. Red and pink segments are deleted in the patients and arrows show the inverted segments. Der: derivative chromosome.

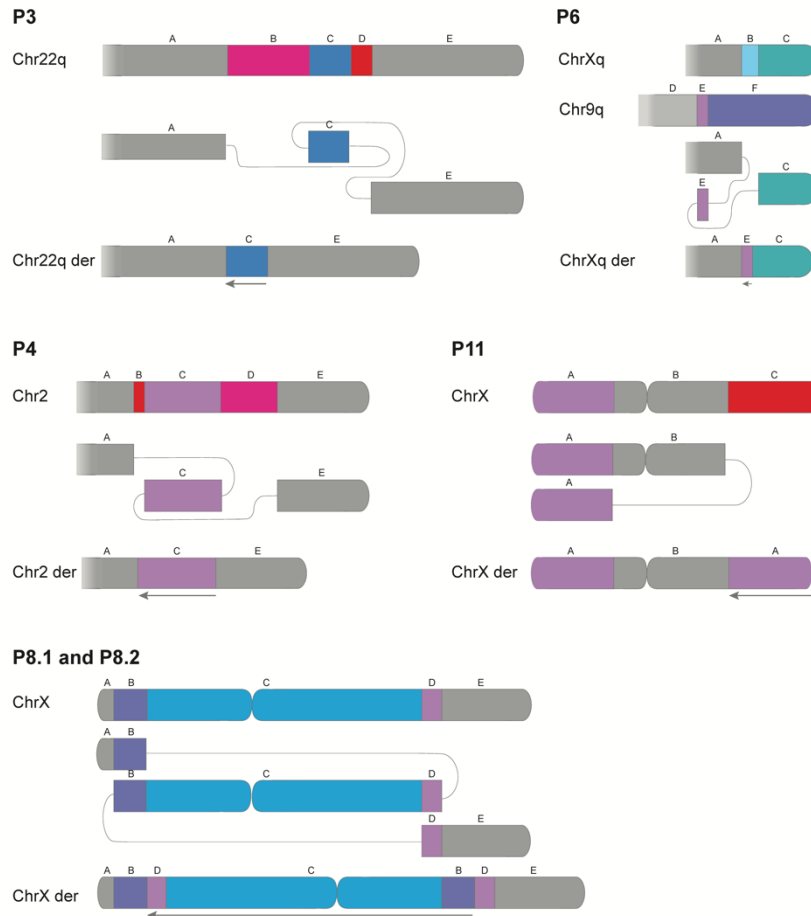

## SUPPLEMENTARY REFERENCES

1. Danecek P, Bonfield JK, Liddle J, Marshall J, Ohan V, Pollard MO, et al. Twelve years of SAMtools and BCFtools. *Gigascience*. 2021;10(2).
2. Li H. Minimap2: pairwise alignment for nucleotide sequences. *Bioinformatics*. 2018;34(18):3094-100.
3. Poplin R, Chang PC, Alexander D, Schwartz S, Colthurst T, Ku A, et al. A universal SNP and small-indel variant caller using deep neural networks. *Nat Biotechnol*. 2018;36(10):983-7.
4. Martin M, Patterson M, Garg S, Fischer SO, Pisanti N, Klau GW, et al. WhatsHap: fast and accurate read-based phasing. *bioRxiv*. 2016:085050.
5. De Coster W, Rademakers R. NanoPack2: population-scale evaluation of long-read sequencing data. *Bioinformatics*. 2023;39(5).



6. Pedersen BS, Quinlan AR. Mosdepth: quick coverage calculation for genomes and exomes. *Bioinformatics*. 2018;34(5):867-8.
7. Cheng H, Concepcion GT, Feng X, Zhang H, Li H. Haplotype-resolved de novo assembly using phased assembly graphs with hifiasm. *Nat Methods*. 2021;18(2):170-5.
